# Supplementary material
Source: HighWire-hosted journal article supplement (https://www.life-science-alliance.org/content/5/5/e202101244/F5)

Full Blot Fig 3B

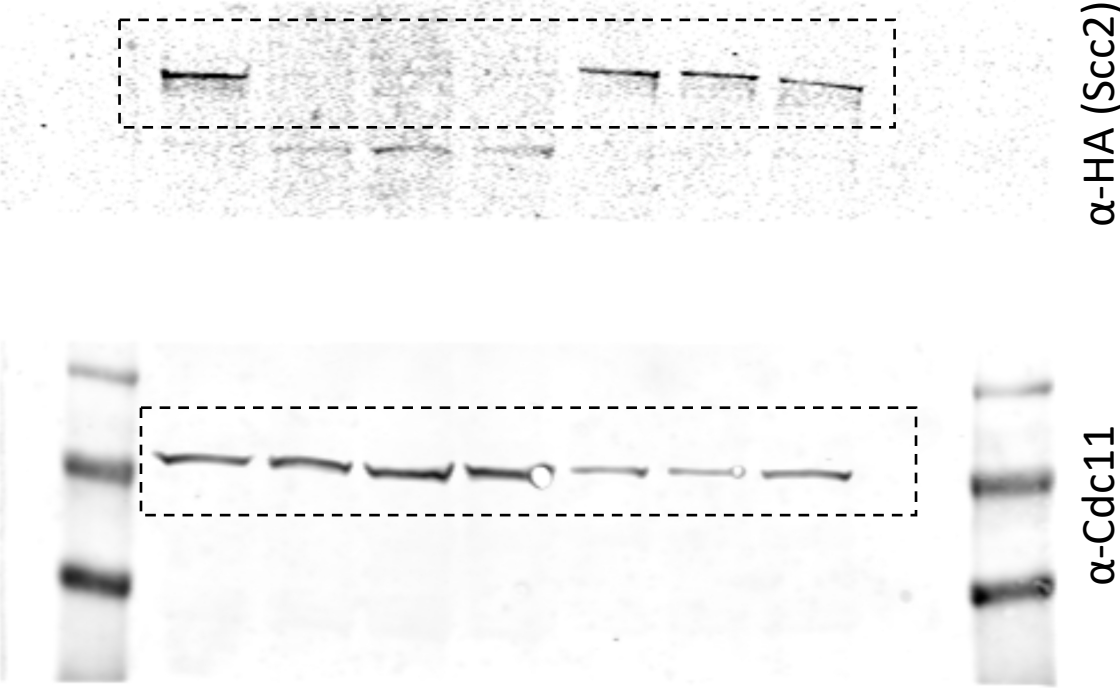

Supplement: inline-supplementary-material-1 [file inline-supplementary-material-1.pdf]
